# Supplementary material for: The effect of feedstock concentration on the crystal phase, morphology, and optical properties of WO3 nanostructures
Source: Royal Society of Chemistry journal article supplement (doi:10.1039/d4ra07112c), 2025-01-01
Supplement: d4ra07112c1.pdf [file d4ra07112c1.pdf]

## Supporting Information

### The effect of feedstock concentration on the crystal phase, morphology, and optical properties of WO<sub>3</sub> nanostructures

Mohsen Zafari<sup>a</sup>, Fatemeh Shariatmadar Tehrani<sup>a</sup>, Seyed Hossein Hosseini Shokouh<sup>b,c</sup>, Alexey A. Popov<sup>d</sup>, and Krisztian Kordas<sup>b</sup>

- Faculty of Physics, University of Semnan, P.O. Box 35195-363, Semnan, Iran
- Microelectronics Research Unit, Faculty of Information Technology and Electrical Engineering, University of Oulu, P.O. Box 4500, FIN-90014 Oulu, Finland
- Department of Electronics and Nanoengineering Aalto University, Tietotie 3 FI-02150, Finland
- VTT Technical Research Centre of Finland, Kaitoväylä 1, FI-90590 Oulu, Finland.

Address correspondence to Fatemeh Shariatmadar Tehrani, f\_tehrani@semnan.ac.ir; Seyed Hossein Hosseini Shokouh, seyed.hosseinishokouh@aalto.fi

#### A. Introduction:

Table S 1 Summary of Previous Studies on molarity and pH changes in presence or absence surfactant agents.

| Creator                   | Used additive                                                                                     | Phase - Morphology                                                                                                     | pH   | Molarity         |
|---------------------------|---------------------------------------------------------------------------------------------------|------------------------------------------------------------------------------------------------------------------------|------|------------------|
| Li et al. [1]             | oxalic acid (H <sub>2</sub> C <sub>2</sub> O <sub>4</sub> )                                       | h-WO <sub>3</sub> longer nanowire                                                                                      | 0.50 | 12 M HCl         |
|                           |                                                                                                   | h-WO <sub>3</sub> longer nanorods                                                                                      | 0.80 |                  |
|                           |                                                                                                   | h-WO <sub>3</sub> nanorods                                                                                             | 1.00 |                  |
|                           |                                                                                                   | h-WO <sub>3</sub> short nanorods                                                                                       | 1.20 |                  |
| Hasse Palharim et al. [2] | ---                                                                                               | a-WO <sub>3</sub> phase irregularly shaped                                                                             | 0.50 | 12 M HCl         |
|                           |                                                                                                   | h-WO <sub>3</sub> irregularly shaped                                                                                   | 1.00 |                  |
|                           |                                                                                                   | h-WO <sub>3</sub> irregularly shaped                                                                                   | 1.50 |                  |
| Shirke and Mukherjee [3]  | With Na <sub>2</sub> SO <sub>4</sub> / K <sub>2</sub> SO <sub>4</sub>                             | h-WO <sub>3</sub> nanorods                                                                                             | 0.95 | 2 M HCl          |
|                           |                                                                                                   | h-WO <sub>3</sub> nanorod bundles                                                                                      | 1.50 |                  |
|                           |                                                                                                   | m-W <sub>18</sub> O <sub>49</sub> co-existed with h-WO <sub>3</sub> cocoon                                             | 1.76 |                  |
|                           |                                                                                                   | m-W <sub>18</sub> O <sub>49</sub> urchin                                                                               | 2.05 |                  |
|                           |                                                                                                   | m-W <sub>18</sub> O <sub>49</sub> fishbone                                                                             | 2.35 |                  |
|                           | ---                                                                                               | o-WO <sub>3</sub> . (H <sub>2</sub> O) <sub>0.33</sub> microsphere                                                     | 0.95 | 2 M HCl          |
|                           |                                                                                                   | o-WO <sub>3</sub> . (H <sub>2</sub> O) <sub>0.33</sub> micro-disk                                                      | 1.50 |                  |
|                           |                                                                                                   | h-WO <sub>3</sub> nanorod bundles                                                                                      | 1.76 |                  |
|                           |                                                                                                   | h-WO <sub>3</sub> nanorod bundles                                                                                      | 2.05 |                  |
|                           |                                                                                                   | h-WO <sub>3</sub> nanorod bundles                                                                                      | 2.35 |                  |
| Nagy et al. [4]           | NH <sub>4</sub> NO <sub>3</sub>                                                                   | m-WO <sub>3</sub> cuboidal nanoplates                                                                                  | 0.10 | 6 M HCl          |
|                           |                                                                                                   | m-WO <sub>3</sub> + o- WO <sub>3</sub> . (H <sub>2</sub> O) <sub>0.33</sub> nanorods                                   | 0.51 |                  |
|                           |                                                                                                   | m-WO <sub>3</sub> + h-WO <sub>3</sub> + o- WO <sub>3</sub> . (H <sub>2</sub> O) <sub>0.33</sub> nanorods + nanoneedles | 1.05 |                  |
|                           |                                                                                                   | h-WO <sub>3</sub> + o- WO <sub>3</sub> . (H <sub>2</sub> O) <sub>0.33</sub> nanoneedles                                | 1.52 |                  |
|                           |                                                                                                   | h-WO <sub>3</sub> nanowires                                                                                            | 2.01 |                  |
| Wang et al. [5]           | Na <sub>2</sub> SO <sub>4</sub> / citric acid (CA, C <sub>6</sub> H <sub>8</sub> O <sub>7</sub> ) | h-WO <sub>3</sub> nanoplatelets, nanoneedles, nanosheet                                                                | 1.50 | 2–3 droplets HCl |
|                           | 0.5 mol citric acid                                                                               | h-WO <sub>3</sub> nanorods or nanoneedles diameters 5 nm to 10 nm                                                      |      |                  |
|                           | 1 mol citric acid                                                                                 | h-WO <sub>3</sub> nanorods with diameter in the range of                                                               |      |                  |

|                                                      |                                                                                                                          |                                                                                                                                                   |       |         |
|------------------------------------------------------|--------------------------------------------------------------------------------------------------------------------------|---------------------------------------------------------------------------------------------------------------------------------------------------|-------|---------|
|                                                      |                                                                                                                          | 50 to 60 nm and length varying from 500 nm to 1 μm                                                                                                |       |         |
|                                                      | 2 mol citric acid                                                                                                        | h-WO <sub>3</sub> pure nanorods (diameter of the nanorods did not further change, and length increased slightly)                                  |       |         |
|                                                      | absence of citric acid                                                                                                   | h-WO <sub>3</sub> nanostructures 2-dimensional (2D) nanoplates or nanosheets 10–20 nm thick (nanoplates were up to 1 μm long and 400–500 nm wide) |       |         |
| Gu et al. [6]                                        | Rb <sub>2</sub> SO <sub>4</sub> / K <sub>2</sub> SO <sub>4</sub><br>H <sub>2</sub> C <sub>2</sub> O <sub>4</sub> (6.3 g) | h-WO <sub>3</sub> nanorod                                                                                                                         | 1~1.2 | 3 M HCl |
|                                                      | 0.3 g, Rb <sub>2</sub> SO <sub>4</sub>                                                                                   | h-WO <sub>3</sub> nanorod                                                                                                                         |       |         |
|                                                      | 1 g, Rb <sub>2</sub> SO <sub>4</sub>                                                                                     | h-WO <sub>3</sub> nanoplates packed nanowires                                                                                                     |       |         |
|                                                      | 0.3 g, K <sub>2</sub> SO <sub>4</sub>                                                                                    | h-WO <sub>3</sub> urchinlike                                                                                                                      |       |         |
|                                                      | 0.5 g, K <sub>2</sub> SO <sub>4</sub>                                                                                    | h-WO <sub>3</sub> nanoribbons                                                                                                                     |       |         |
|                                                      | 1 g, K <sub>2</sub> SO <sub>4</sub>                                                                                      | h-WO <sub>3</sub> ribbonlike                                                                                                                      |       |         |
|                                                      | 1 g of Na <sub>2</sub> SO <sub>4</sub>                                                                                   | h-WO <sub>3</sub> cylindrical nanowires bundle                                                                                                    |       |         |
| 2 g, (NH <sub>4</sub> ) <sub>2</sub> SO <sub>4</sub> | h-WO <sub>3</sub> nanorods                                                                                               |                                                                                                                                                   |       |         |
| Peng et al. [7]                                      | without Na <sub>2</sub> SO <sub>4</sub>                                                                                  | h-WO <sub>3</sub> irregular aggregation                                                                                                           | 2.00  | 3 M HCl |
|                                                      | 0.125 M Na <sub>2</sub> SO <sub>4</sub>                                                                                  | h-WO <sub>3</sub> irregular particles, nanorods and their bundles,                                                                                |       |         |
|                                                      | 0.25 M Na <sub>2</sub> SO <sub>4</sub>                                                                                   | h-WO <sub>3</sub> nanorods with diameter of 30–150 nm and length of 0.5–5 mm                                                                      |       |         |
|                                                      | 0.50 M Na <sub>2</sub> SO <sub>4</sub>                                                                                   | h-WO <sub>3</sub> , c- H <sub>2</sub> W <sub>2</sub> O <sub>7</sub> irregular lamellae and nanorods                                               |       |         |
|                                                      | 1.0 M Na <sub>2</sub> SO <sub>4</sub>                                                                                    | h-WO <sub>3</sub> , c-H <sub>2</sub> W <sub>2</sub> O <sub>7</sub> lamellar aggregation and few irregular particles                               |       |         |
|                                                      | 2.0 M Na <sub>2</sub> SO <sub>4</sub>                                                                                    | h-WO <sub>3</sub> and c H <sub>2</sub> W <sub>2</sub> O <sub>7</sub>                                                                              |       |         |

**B. FE-SEM images of the unique morphology of W0.7:**

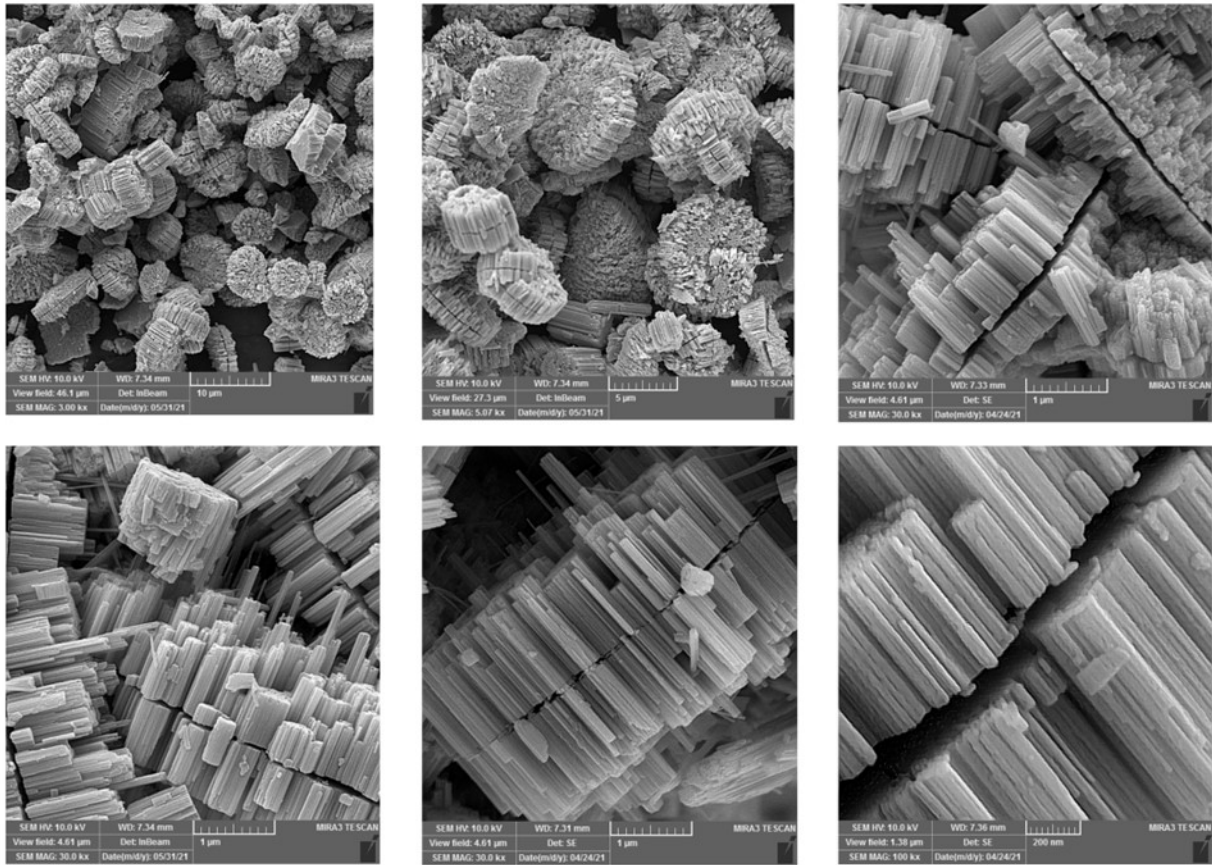

Fig. S1. FESEM image of unique morphology of sunflower-like of W0.7.

### C. BET analysis:

Nitrogen adsorption-desorption isotherms of the prepared samples including W3.0, W0.3N, W0.7, and W0.7N are shown in Fig. S2. In accordance with the IUPAC classification, all of them have hysteresis loops of type H3, which is characteristic of mesoporous materials (Fig. S2) [8]. The pore size distribution and specific surface area of the products were derived using BJH and BET methods. The peaks for distribution of pore size are placed at 25.4, 6.0, 12.4, and 5.2 nm for W3.0, W0.3N, W0.7, and W0.7N, respectively. The specific surface area of samples W3.0, W0.3N, W0.7, and W0.7N is 3.9, 20.9, 8.4, and 18.6 m<sup>2</sup>/g, respectively.

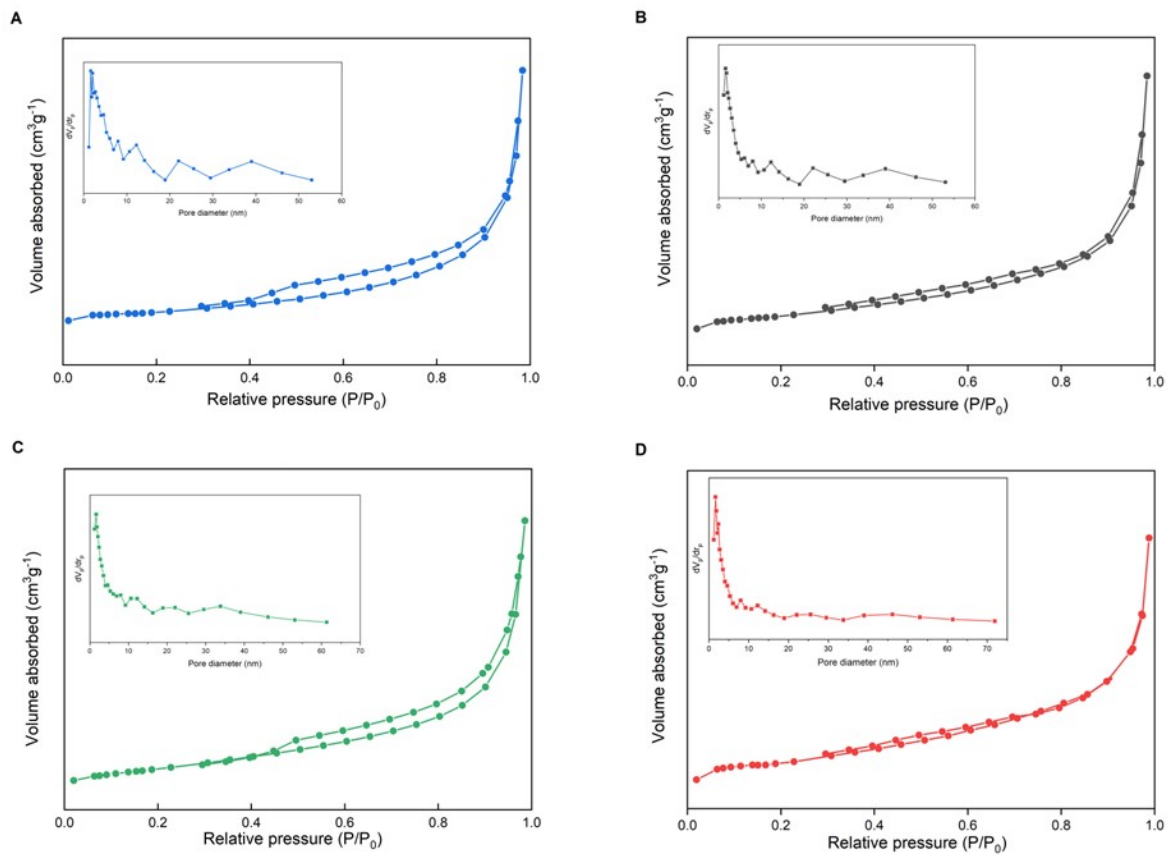

Fig. S2. N<sub>2</sub> adsorption-desorption isotherms and pore size distributions of (a) W3.0, (b) W0.3N, (c) W0.7, and (d) W0.7N.

## D. EDX analysis:

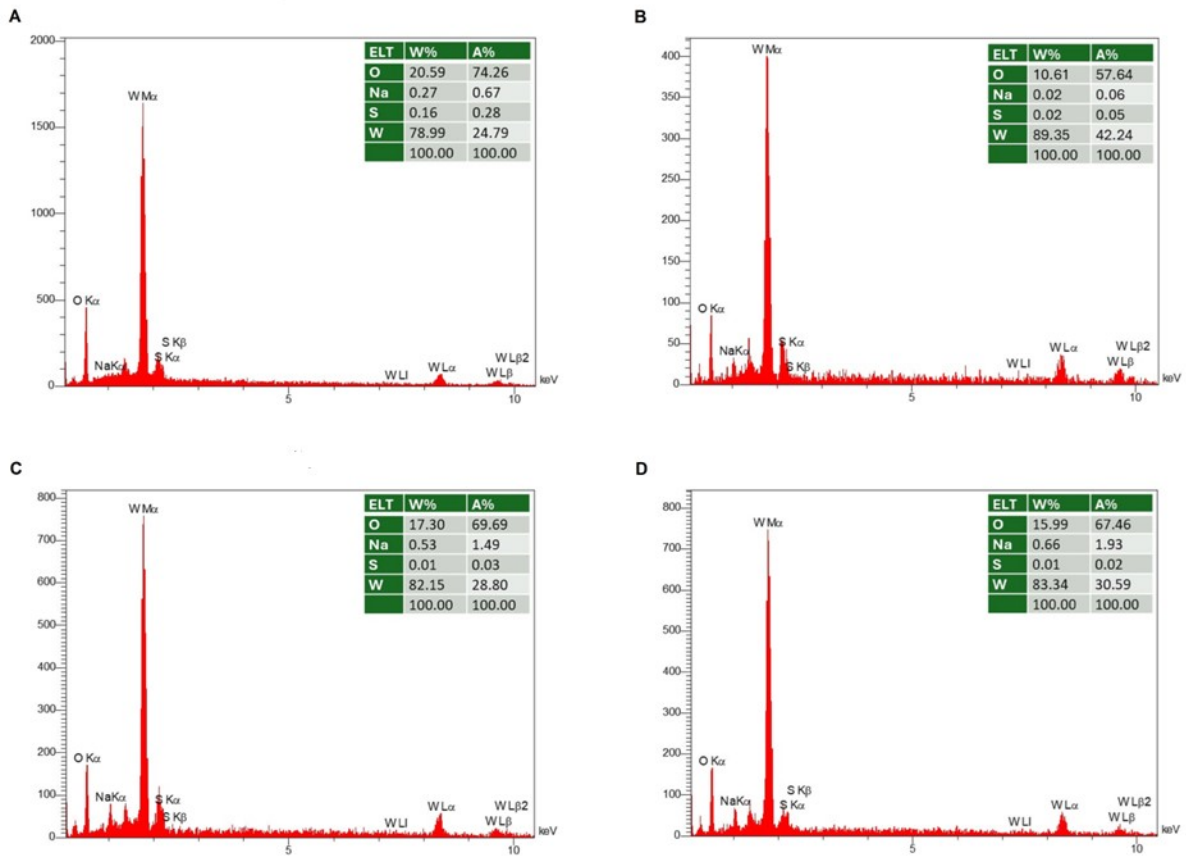

Fig. S3. EDX analysis results of (a) W3.0, (b) W3.0N, (c) W0.7, and (d) W0.7N.

## E. FTIR and Raman analysis:

Table S 2. The list of all the relevant vibration modes observed in the FTIR spectra of nanostructures.

| Wavenumber (cm <sup>-1</sup> )                                                 | Vibration modes                         | Ref.      |
|--------------------------------------------------------------------------------|-----------------------------------------|-----------|
| 3517.9, 3544.9, 3421.4                                                         | $\nu(\text{OH})$                        | [9,10,11] |
| 1606.5, 1600.8                                                                 | $\delta(\text{OH})$                     | [9]       |
| 1143                                                                           | W-OH / $\delta(\text{W-OH})$            | [12]      |
| 821.6, 825.4                                                                   | $\nu(\text{W=O})$                       | [9]       |
| 746.4, 734.8, 711.6,<br>676.9, 653.8, 649.9, 644.2, 688.5, 605.6, 680.8, 690.4 | $\nu(\text{W=O})$ / $\nu(\text{O-W-O})$ | [9,11]    |

Table S 3. The list of vibration modes observed in the Raman spectra.

| Raman Shift (cm <sup>-1</sup> ) | Vibration mode                                                                     | Ref.   |
|---------------------------------|------------------------------------------------------------------------------------|--------|
| 926, 932                        | Stretching mode W=O                                                                | [9,13] |
| 806, 816, 817                   | $\nu(\text{O-W-O})$                                                                | [9,13] |
| 714, 758                        | $\nu(\text{W-O})$ / $\nu_a$ (antisymmetric stretch of transition metal oxide bond) | [9,13] |
| 657, 667, 684                   | $\nu(\text{O-W-O})$ / $\gamma(\text{O-W-O})$                                       | [9,13] |
| 320, 324, 329                   | $\delta(\text{O-W-O})$                                                             | [13]   |
| 242, 243, 274                   | $\nu(\text{O-W-O})$ / $\delta(\text{O-W-O})$                                       | [13]   |
| 107, 112, 137                   | low-frequency phonon temperature change marker                                     | [13]   |

## F. Deconvoluted PL Spectra of WO<sub>3</sub> nanostructures:

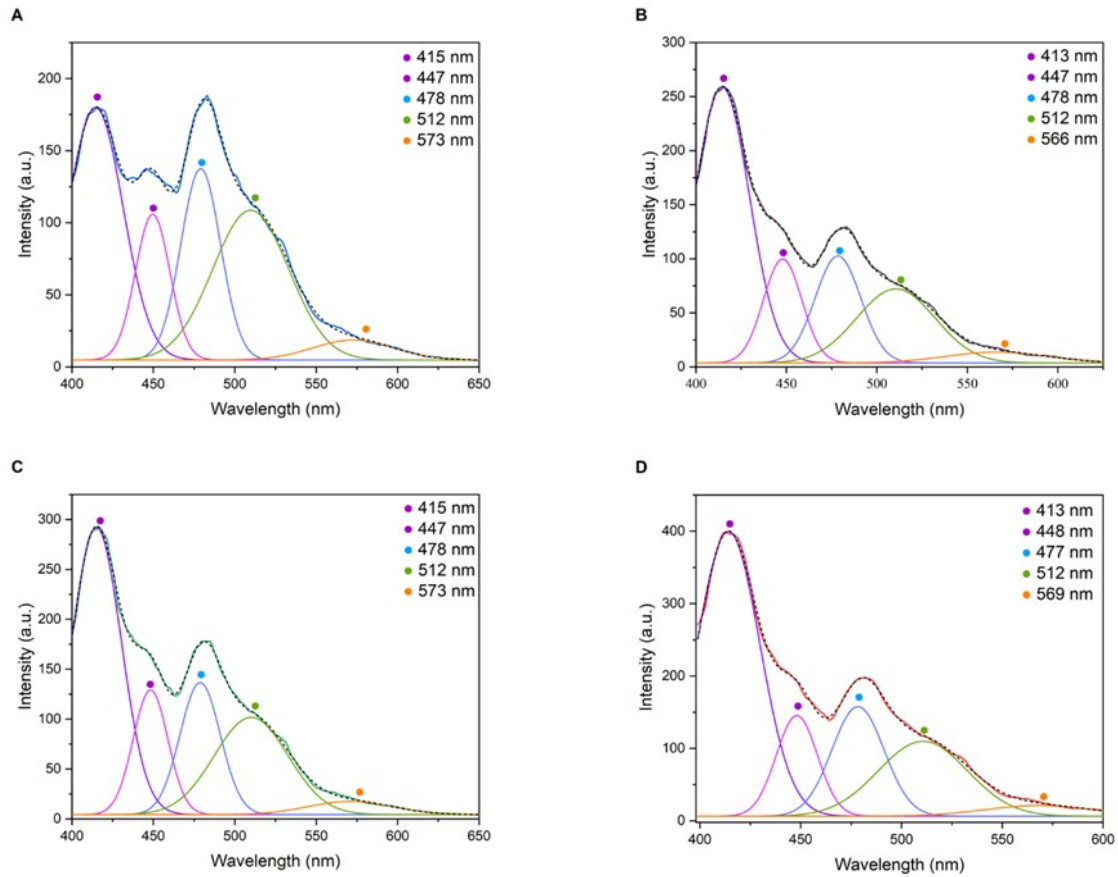

Fig. S4. Deconvoluted PL spectra of (a) W3.0, (b) W3.0N, (c) W0.7, and (d) W0.7N.

# G. XRD patterns of WO<sub>3</sub> nanostructures:

A

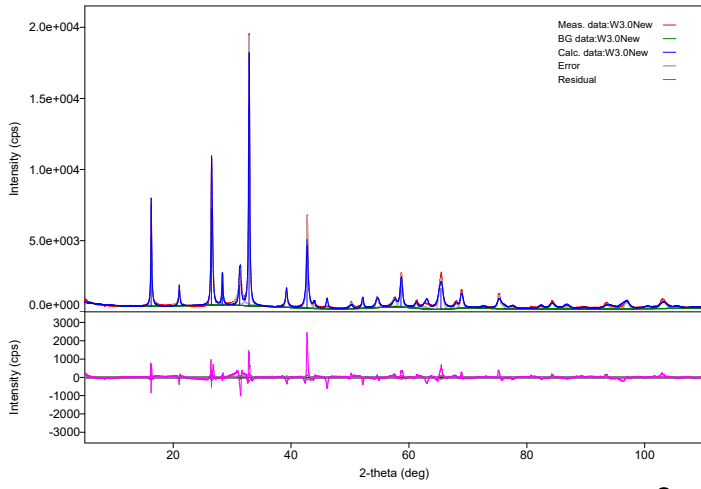

B

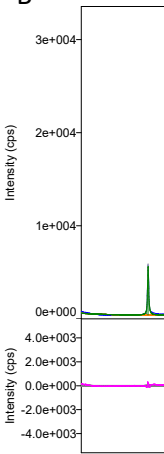

W3.0

C

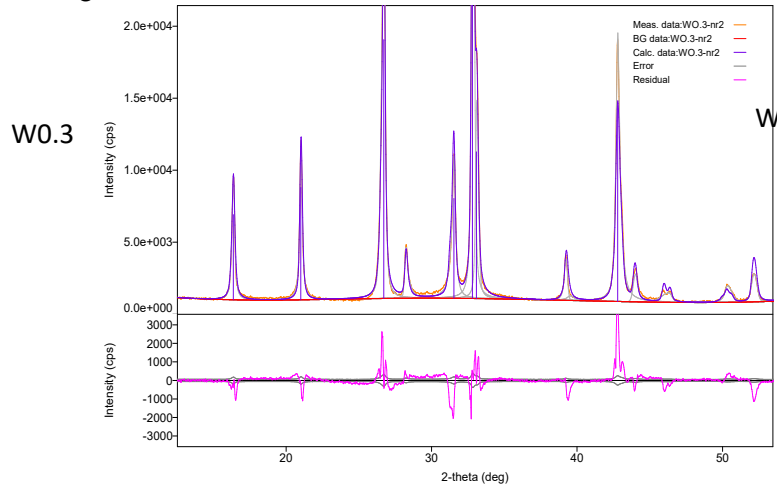

D

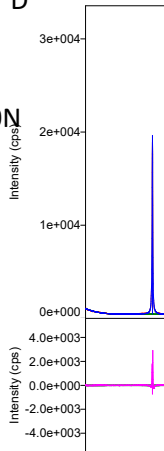

E

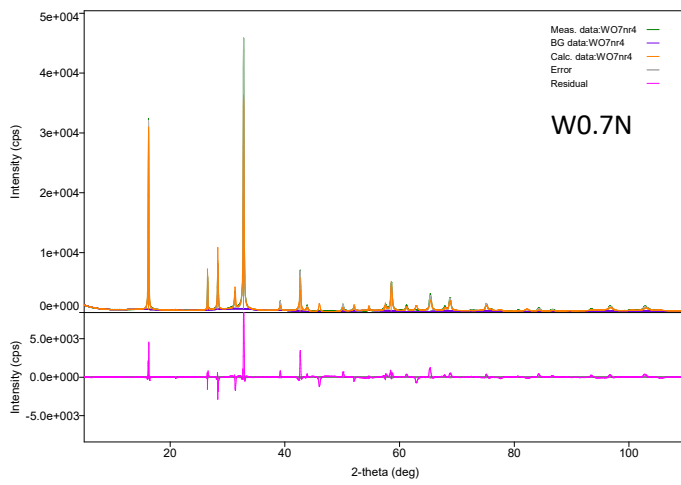



Fig. S5. XRD patterns of A) W3.0, B) W0.7, C) W0.3, D) W3.0N, and E) W0.7N along with their fitting residuals in phase analysis.

## References:

- [1] N. Li, T. Chang, H. Gao, X. Gao and L. Ge, *Nanotechnology*, 2019, **30**, 415601.
- [2] P. Hasse Palharim, B. Lara Diego dos Reis Fusari, B. Ramos, L. Otubo and A. C. Silva Costa Teixeira, *J. Photochem. Photobiol. Chem.*, 2022, **422**, 113550.
- [3] Y. M. Shirke and S. P. Mukherjee, *CrystEngComm*, 2017, **19**, 2096–2105.
- [4] D. Nagy, D. Nagy, I. M. Szilágyi and X. Fan, *RSC Adv.*, 2016, **6**, 33743–33754.
- [5] X. Wang, H. Zhang, L. Liu, W. Li and P. Cao, *Mater. Lett.*, 2014, **130**, 248–251.
- [6] Z. Gu, T. Zhai, B. Gao, X. Sheng, Y. Wang, H. Fu, Y. Ma and J. Yao, *J. Phys. Chem. B*, 2006, **110**, 23829–23836.
- [7] T. Peng, D. Ke, J. Xiao, L. Wang, J. Hu and L. Zan, *J. Solid State Chem.*, 2012, **194**, 250–256.
- [8] F. J. Sotomayor, K. A. Cychosz and M. Thommes, 2018, 18.
- [9] M. Gotić, M. Ivanda, S. Popović and S. Musić, *Mater. Sci. Eng. B*, 2000, **77**, 193–201.
- [10] H.-F. Pang, X. Xiang, Z.-J. Li, Y.-Q. Fu and X.-T. Zu, *Phys. Status Solidi A*, 2012, **209**, 537–544.
- [11] B. Gerand and M. Fjglarz, *J. Solid State Chem.*, 1987, 13.
- [12] C. Hai-Ning, preparation and characterization of optical multilayered coatings for smart windows applications, University of Minho, 2005.
- [13] R. F. Garcia-Sanchez, T. Ahmido, D. Casimir, S. Baliga and P. Misra, *J. Phys. Chem. A*, 2013, **117**, 13825–13831.
